# Supplementary material for: Fluctuations in Intestinal Microbiota Following Ingestion of Natto Powder Containing Bacillus subtilis var. natto SONOMONO Spores: Considerations Using a Large-Scale Intestinal Microflora Database
Source: MDPI journal article supplement (doi:10.3390/nu14183839), 2022-09-16
Supplement: s1 [file s1]

## Supplementary Tables

**Table S1.** Comparison of diversity (genus level) on Day 0.

| (A) $\alpha$ -diversity on Day 0 |           |               |         |
|----------------------------------|-----------|---------------|---------|
| Gender                           | Group     | Simpson index | p-value |
| Males                            | LNC       | 0.827±0.053   | 0.316   |
|                                  | Control   | 0.842±0.056   |         |
| Females                          | LNC       | 0.848±0.059   | 0.705   |
|                                  | Control   | 0.846±0.054   |         |
| (B) $\beta$ -diversity on Day 0  |           |               |         |
| Gender                           | p-value   |               |         |
|                                  | PerMANOVA | dispersion    |         |
| Males                            | 0.376     | 0.155         |         |
| Females                          | 0.287     | 0.038         |         |

Values are mean ± SD.

**Table S2.** Comparison of genus-level intestinal microbiota on Day 0.

| (A) Comparison of genus-level intestinal microbiota in males on Day 0   |                        |         |         |
|-------------------------------------------------------------------------|------------------------|---------|---------|
| Genus                                                                   | Relative abundance (%) |         | p-value |
|                                                                         | LNC                    | Control |         |
| <i>Phocaeicola</i> †                                                    | 20.96                  | 24.52   | 0.233   |
| <i>Prevotella</i>                                                       | 11.67                  | 6.23    | 0.299   |
| Unclassified                                                            | 10.65                  | 9.15    | 0.701   |
| <i>Bifidobacterium</i>                                                  | 6.17                   | 8.51    | 0.054   |
| <i>Bacteroides</i>                                                      | 5.63                   | 5.73    | 0.663   |
| <i>Faecalibacterium</i>                                                 | 5.08                   | 4.79    | 0.714   |
| <i>Megamonas</i>                                                        | 4.95                   | 2.98    | 0.336   |
| <i>Blautia</i>                                                          | 3.06                   | 4.56    | 0.098   |
| <i>Fusicatenibacter</i>                                                 | 2.59                   | 3.08    | 0.551   |
| <i>Collinsella</i>                                                      | 2.34                   | 1.93    | 0.765   |
| <i>Parabacteroides</i>                                                  | 2.33                   | 2.88    | 0.438   |
| <i>Streptococcus</i>                                                    | 2.32                   | 1.32    | 0.449   |
| <i>Agathobacter</i>                                                     | 1.99                   | 2.31    | 0.811   |
| <i>Ruminococcus</i>                                                     | 1.71                   | 1.60    | 0.592   |
| <i>Alistipes</i>                                                        | 1.57                   | 1.41    | 0.830   |
| <i>Holdemanella</i>                                                     | 1.54                   | 1.08    | 0.663   |
| <i>Faecalibacillus</i>                                                  | 1.48                   | 1.29    | 0.749   |
| <i>Dorea</i>                                                            | 1.22                   | 1.58    | 0.405   |
| <i>Phascolarctobacterium</i>                                            | 1.21                   | 0.87    | 0.519   |
| <i>Lachnospira</i>                                                      | 1.09                   | 0.85    | 0.631   |
| (B) Comparison of genus-level intestinal microbiota in females on Day 0 |                        |         |         |
| Genus                                                                   | Relative abundance (%) |         | p-value |
|                                                                         | LNC                    | Control |         |
| <i>Phocaeicola</i> †                                                    | 23.93                  | 17.31   | 0.092   |
| Unclassified                                                            | 13.39                  | 10.83   | 0.327   |
| <i>Bacteroides</i>                                                      | 9.76                   | 11.11   | 0.835   |
| <i>Bifidobacterium</i>                                                  | 7.70                   | 9.77    | 0.429   |
| <i>Faecalibacterium</i>                                                 | 6.94                   | 5.79    | 0.313   |
| <i>Fusicatenibacter</i>                                                 | 3.82                   | 2.55    | 0.143   |
| <i>Blautia</i>                                                          | 3.18                   | 3.92    | 0.369   |
| <i>Parabacteroides</i>                                                  | 3.05                   | 3.53    | 0.585   |
| <i>Alistipes</i>                                                        | 2.88                   | 4.11    | 0.501   |
| <i>Agathobacter</i>                                                     | 2.54                   | 2.02    | 0.684   |
| <i>Prevotella</i>                                                       | 2.30                   | 6.99    | 0.477   |
| <i>Ruminococcus</i>                                                     | 2.23                   | 2.36    | 0.787   |
| <i>Anaerostipes</i>                                                     | 1.38                   | 0.83    | 0.149   |
| <i>Megamonas</i>                                                        | 1.14                   | 0.44    | 0.457   |
| <i>Holdemanella</i>                                                     | 1.11                   | 1.38    | 0.396   |
| <i>Lachnospira</i>                                                      | 1.10                   | 1.37    | 0.584   |
| <i>Dorea</i>                                                            | 1.01                   | 0.87    | 0.648   |
| <i>Streptococcus</i>                                                    | 0.99                   | 2.24    | 0.286   |
| <i>Mediterraneibacter</i>                                               | 0.84                   | 0.47    | 0.103   |
| <i>Collinsella</i>                                                      | 0.83                   | 1.17    | 0.705   |

The list includes the 20 most abundant genera identified in the LNC group.

† *Phocaeicola* is a genus reclassified from *Bacteroides* in 2019.

**Table S3.** Changes in  $\beta$ -diversity at the genus level.

| Gender  | Group   | Comparison |        | p-value   |            |
|---------|---------|------------|--------|-----------|------------|
|         |         |            |        | PerMANOVA | dispersion |
| Males   | LNC     | Day 0      | Day 31 | 0.584     | 0.046      |
|         |         | Day 31     | Day 62 | 0.010     | 0.046      |
|         |         | Day 0      | Day 62 | 0.010     | 0.763      |
|         | Control | Day 0      | Day 31 | 0.396     | 0.046      |
|         |         | Day 31     | Day 62 | 0.010     | 0.084      |
|         |         | Day 0      | Day 62 | 0.010     | 0.606      |
| Females | LNC     | Day 0      | Day 31 | 0.842     | 0.333      |
|         |         | Day 31     | Day 62 | 0.010     | 0.118      |
|         |         | Day 0      | Day 62 | 0.010     | 0.525      |
|         | Control | Day 0      | Day 31 | 0.545     | 0.286      |
|         |         | Day 31     | Day 62 | 0.010     | 0.392      |
|         |         | Day 0      | Day 62 | 0.010     | 0.797      |

**Table S4.** Genera whose abundance differed significantly between IB and NB groups.

| Genus                  | Relative abundance (%) |   |      |      |   |      | p-value |
|------------------------|------------------------|---|------|------|---|------|---------|
|                        | IB                     |   |      | NB   |   |      |         |
| <i>Bifidobacterium</i> | 8.02                   | ± | 8.19 | 1.08 | ± | 1.93 | 0.003   |

Values are mean ±SD.

**Table S5.** Sample size for each group.

|              | <b>Males</b> | <b>Females</b> |
|--------------|--------------|----------------|
| Healthy      | 52           | 240            |
| Obesity      | 680          | 663            |
| Diabetes     | 30           | 17             |
| Dyslipidemia | 72           | 137            |
| Hypertension | 112          | 108            |

**Table S6.** Comparison of genus-level intestinal microbiota in each disease and healthy group.

| (A) Comparison of genus-level intestinal microbiota in males   |         |         |         |          |         |              |         |              |         |
|----------------------------------------------------------------|---------|---------|---------|----------|---------|--------------|---------|--------------|---------|
|                                                                | Healthy | Obesity |         | Diabetes |         | Dyslipidemia |         | Hypertension |         |
|                                                                | RA (%)  | RA (%)  | p-value | RA (%)   | p-value | RA (%)       | p-value | RA (%)       | p-value |
| <i>Phocaeicola</i>                                             | 15.89   | 19.08   | 0.373   | 15.73    | 0.384   | 21.60        | 0.044   | 17.62        | 0.790   |
| Unclassified                                                   | 14.63   | 12.78   | 0.053   | 15.50    | 0.238   | 12.47        | 0.139   | 14.79        | 0.810   |
| <i>Bacteroides</i>                                             | 10.99   | 9.70    | 0.034   | 13.16    | 0.812   | 13.02        | 0.646   | 11.40        | 0.618   |
| <i>Prevotella</i>                                              | 10.86   | 10.75   | 0.706   | 3.71     | 0.523   | 6.65         | 0.466   | 9.07         | 0.752   |
| <i>Faecalibacterium</i>                                        | 8.03    | 6.26    | 0.003   | 6.21     | 0.007   | 6.36         | 0.026   | 6.50         | 0.025   |
| <i>Bifidobacterium</i>                                         | 4.55    | 3.70    | 0.003   | 6.29     | 0.831   | 3.78         | 0.092   | 2.75         | 0.000   |
| <i>Alistipes</i>                                               | 3.03    | 2.41    | 0.002   | 4.85     | 0.372   | 2.65         | 0.170   | 3.28         | 0.177   |
| <i>Blautia</i>                                                 | 2.96    | 2.84    | 0.558   | 1.71     | 0.019   | 3.28         | 0.472   | 3.32         | 0.577   |
| <i>Agathobacter</i>                                            | 2.40    | 2.00    | 0.240   | 0.94     | 0.006   | 1.43         | 0.028   | 1.77         | 0.167   |
| <i>Anaerostipes</i>                                            | 2.26    | 1.39    | 0.005   | 0.77     | 0.001   | 1.58         | 0.177   | 1.33         | 0.030   |
| (B) Comparison of genus-level intestinal microbiota in females |         |         |         |          |         |              |         |              |         |
|                                                                | Healthy | Obesity |         | Diabetes |         | Dyslipidemia |         | Hypertension |         |
|                                                                | RA (%)  | RA (%)  | p-value | RA (%)   | p-value | RA (%)       | p-value | RA (%)       | p-value |
| Unclassified                                                   | 17.04   | 15.28   | 0.027   | 18.00    | 0.792   | 16.32        | 0.318   | 16.63        | 0.643   |
| <i>Phocaeicola</i>                                             | 17.01   | 16.88   | 0.764   | 18.64    | 0.476   | 15.45        | 0.111   | 17.72        | 0.723   |
| <i>Bacteroides</i>                                             | 13.54   | 14.40   | 0.418   | 10.79    | 0.177   | 15.66        | 0.075   | 13.68        | 0.776   |
| <i>Faecalibacterium</i>                                        | 7.65    | 6.98    | 0.033   | 6.35     | 0.658   | 7.93         | 0.879   | 7.29         | 0.402   |
| <i>Bifidobacterium</i>                                         | 5.22    | 4.26    | 0.003   | 4.39     | 0.323   | 4.41         | 0.093   | 4.15         | 0.117   |
| <i>Alistipes</i>                                               | 4.39    | 3.50    | 0.002   | 2.40     | 0.036   | 4.21         | 0.613   | 4.38         | 0.630   |
| <i>Prevotella</i>                                              | 4.16    | 5.48    | 0.230   | 7.62     | 0.269   | 5.21         | 0.603   | 4.59         | 0.655   |
| <i>Blautia</i>                                                 | 3.43    | 3.25    | 0.351   | 2.89     | 0.696   | 3.21         | 0.575   | 3.69         | 0.693   |
| <i>Parabacteroides</i>                                         | 2.42    | 2.98    | 0.154   | 2.28     | 0.693   | 2.43         | 0.757   | 2.77         | 0.289   |
| <i>Anaerostipes</i>                                            | 2.06    | 1.61    | 0.002   | 1.71     | 0.551   | 1.72         | 0.117   | 1.57         | 0.029   |

Values are mean. RA, relative abundance. The list includes the 10 most abundant genera identified in the healthy group
